# Supplementary material
Source: Springer Nature journal article supplement (https://www.springermedizin.de/resource/supplementary/12958_2003_59_MOESM3_ESM.pdf/9566282)

**Smac/DIABLO**

**XIAP**

**Negative control**

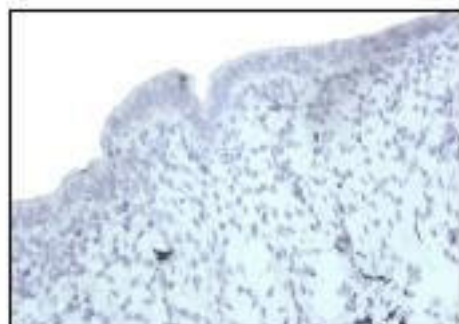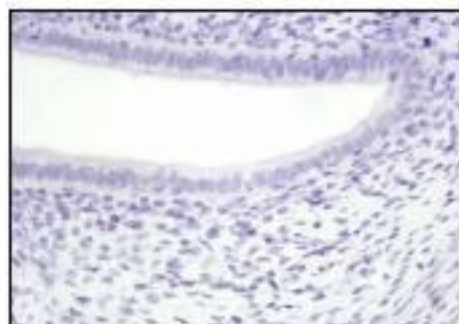

**Diestrus**

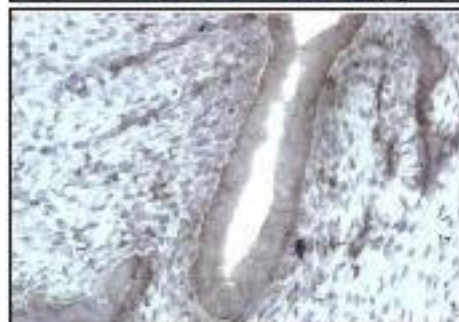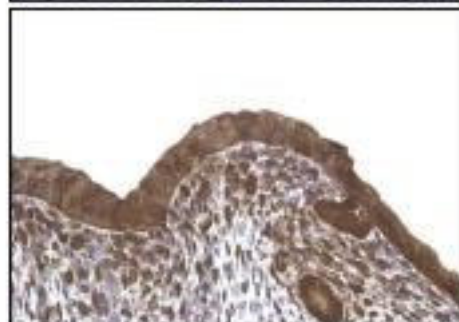

**Proestrus**

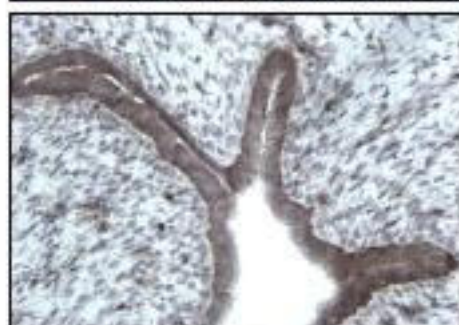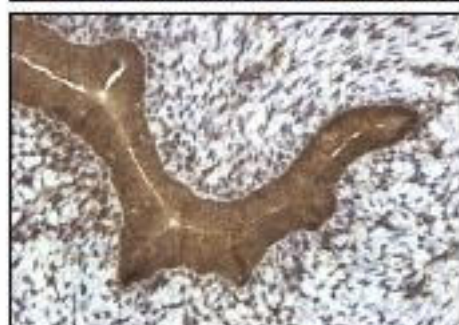

**Estrus**

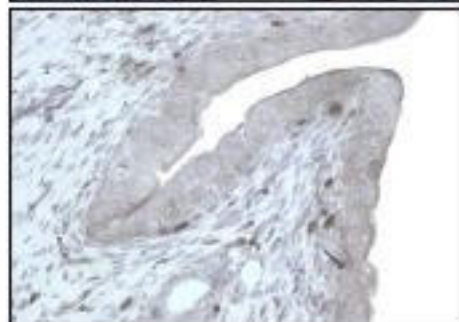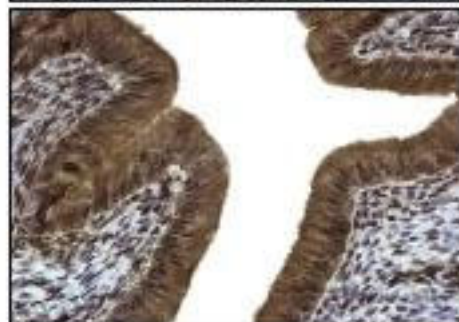

**Metestrus**

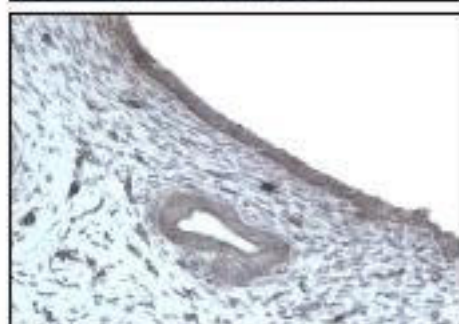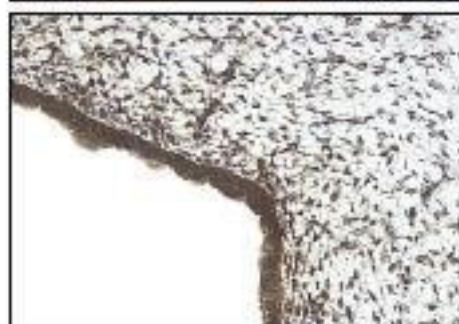

Supplement: MOESM3 [file 9566282]
